# Supplementary material for: Investigation of the water-induced polar facet stabilization mechanism in ZnO nanoplates with 1H NMR spectroscopy
Source: Royal Society of Chemistry journal article supplement (doi:10.1039/d5cp01005e), 2025-01-01
Supplement: d5cp01005e1.pdf [file d5cp01005e1.pdf]

**Electronic Supplementary Information**

for

**Investigations of water-induced polar facet stabilization  
mechanism in ZnO nanoplates with  $^1\text{H}$  NMR spectroscopy**

Benteng Song,<sup>†a\*</sup> Qin Zhu,<sup>†b</sup> Ling-Hai Xie<sup>a</sup>

<sup>a</sup> Key Laboratory for Organic Electronics and Information Displays (KLOEID) & Institute of Advanced Materials (IAM), Jiangsu National Synergetic Innovation Center for Advanced Materials (SICAM), Nanjing University of Posts & Telecommunications, 9 Wenyuan Road, Nanjing 210023, China

<sup>b</sup> Key Laboratory of Mesoscopic Chemistry of Ministry of Education and Collaborative Innovation Center of Chemistry for Life Sciences, School of Chemistry and Chemical Engineering, Nanjing University, Nanjing 210023, China

<sup>†</sup> These authors contributed equally.

\* Correspondence: 1345385561@qq.com

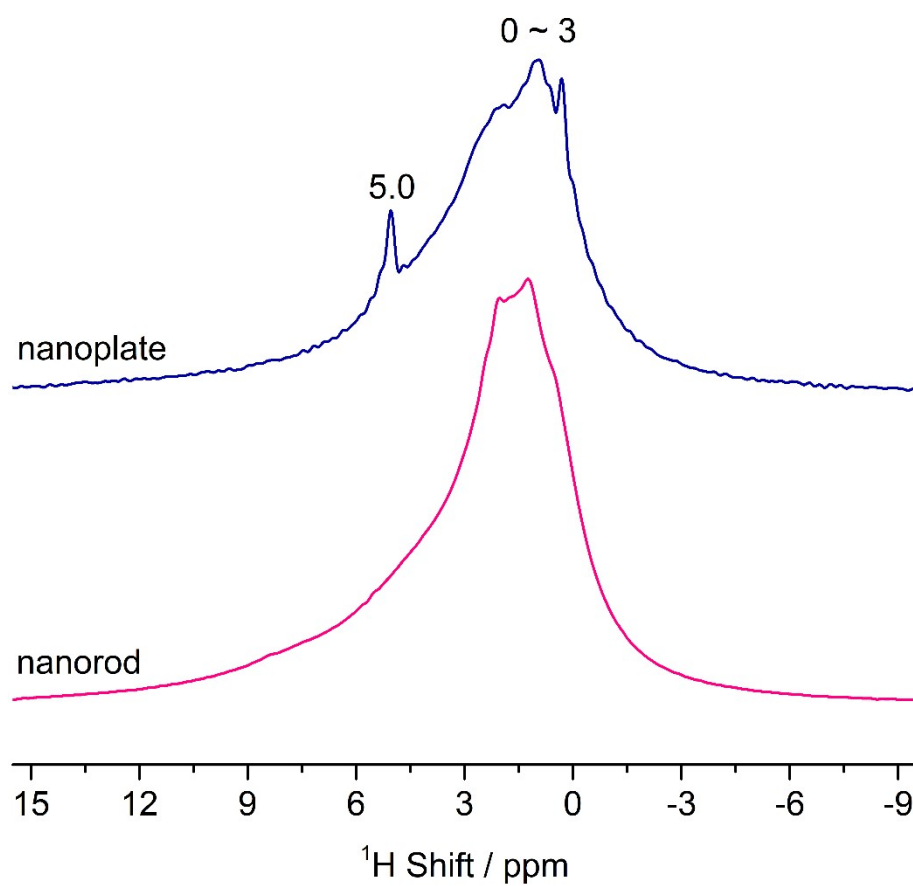

**Figure S1.** The comparison for  $^1\text{H}$  NMR spectra of ZnO nanorods and ZnO nanoplates after vacuum dried at room temperature. Recycle delays of 5 s were used and 64 scans were collected for each NMR spectrum.

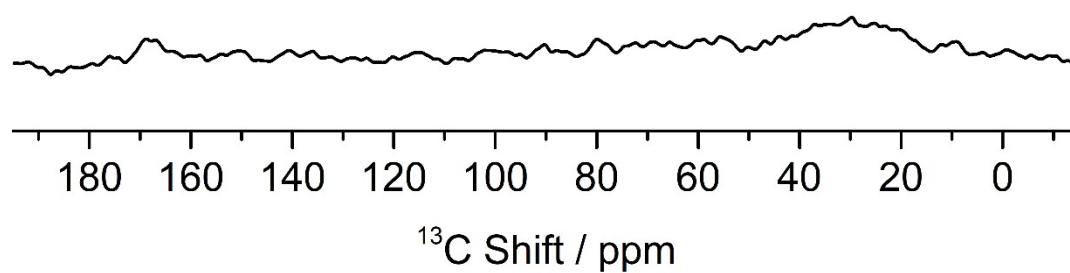

**Figure S2.**  $^{13}\text{C}$  CP/MAS spectrum of ZnO nanoplates after washing and calcining procedures. The optimized contact time of 2000  $\mu\text{s}$  and recycle delay of 5 s were used and 8000 acquisitions were accumulated for the spectrum.

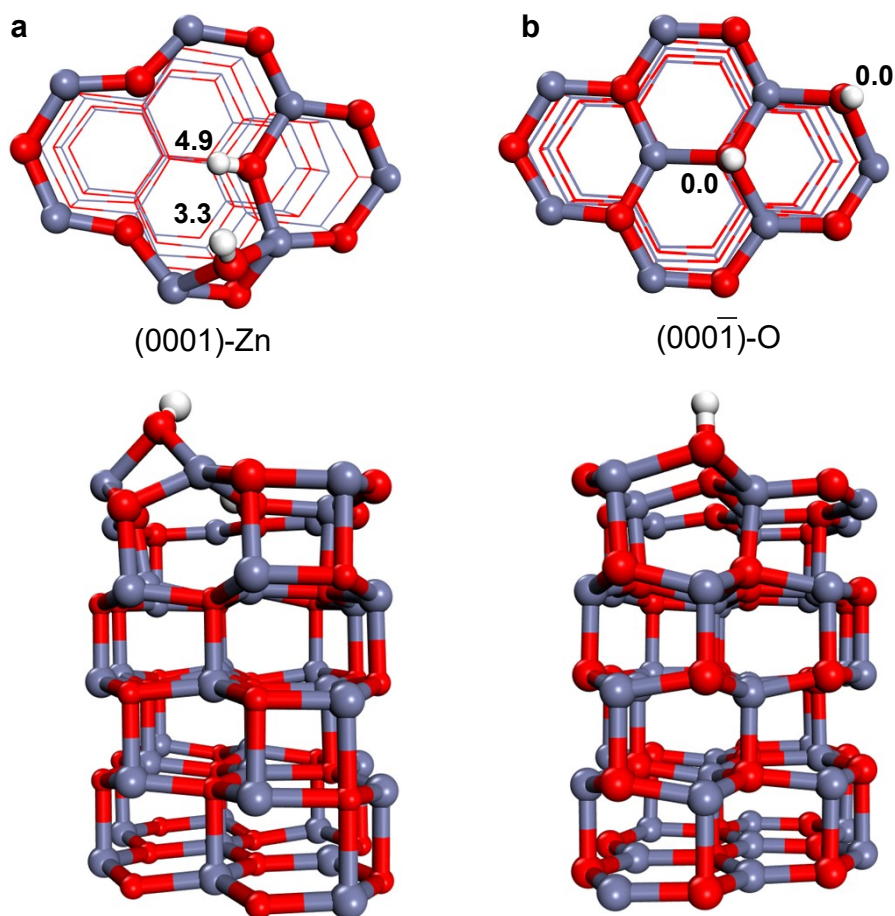

**Figure S3.** Calculated structures of ZnO nanoplates for water dissociation at Zn vacancy on polar Zn-terminated surface and at O vacancy on polar O-terminated surface, respectively, and corresponding chemical shifts for surface hydrogen species. Top: top view; bottom: side view. Gray, red and white spheres represent Zn, O and H atoms, respectively.

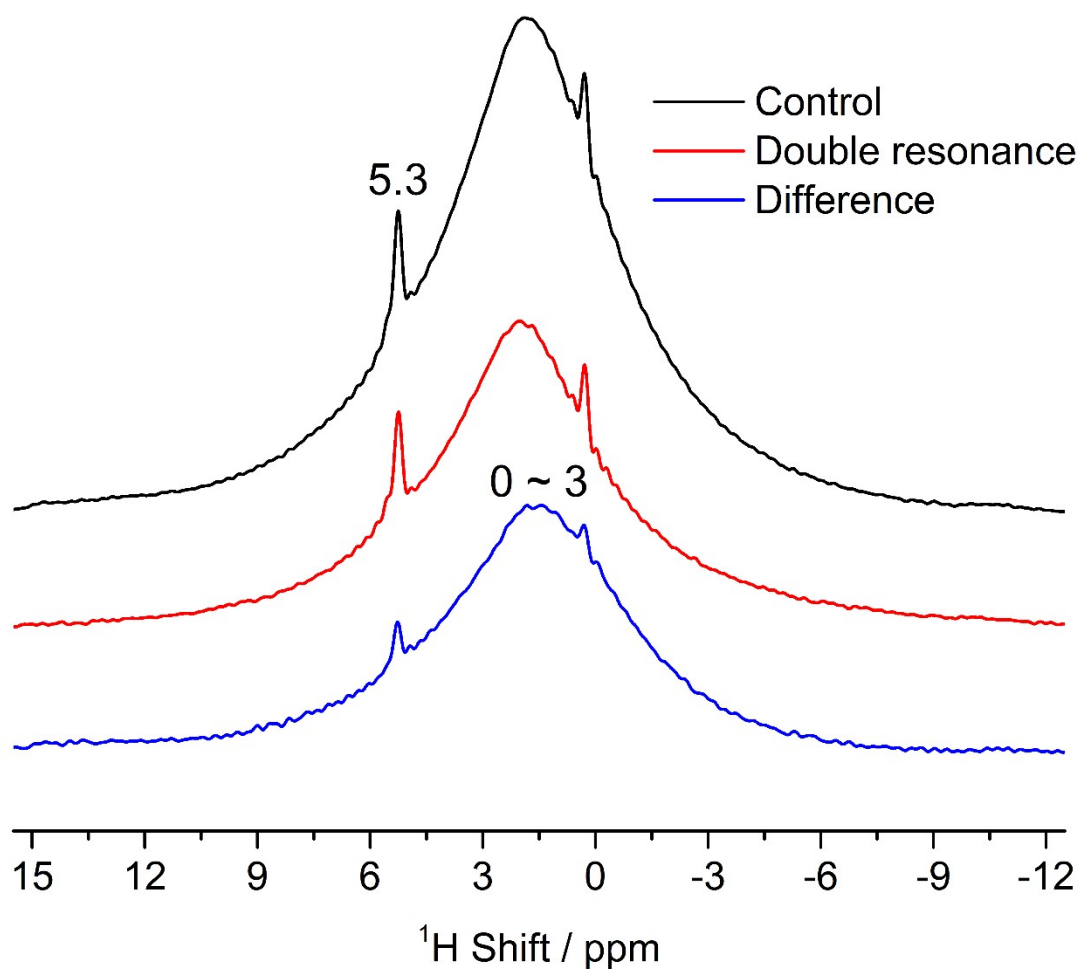

**Figure S4.**  $^1\text{H}$ - $^{17}\text{O}$  TRAPDOR NMR spectra of ZnO nanoplates.  $^{17}\text{O}$  irradiation time: 0.2 ms; MAS rate: 5 kHz; recycle delay: 2 s;  $^{17}\text{O}$  irradiation radio frequency (RF) field strength: 64 kHz. The difference spectrum is obtained by subtracting the double resonance spectrum from the control spectrum.

$^1\text{H}$ - $^{17}\text{O}$  transfer of population in double resonance (TRAPDOR) NMR experiments provide further evidences for spectral assignments.<sup>1</sup> TRAPDOR NMR spectra with a short  $^{17}\text{O}$  irradiation time of about 0.2 ms are shown in Figure S4. The difference spectrum shows a broad peak at 0 ~ 3 ppm and a narrow peak at 5.3 ppm, implying relatively short H-O distances are involved for these hydrogen sites. Combined with

discussions in Fig. 2 and our previous work in ZnO nanorods,<sup>2</sup> the broad peak at 0 ~ 3 ppm can be ascribed to hydroxyl groups and/or adsorbed water.

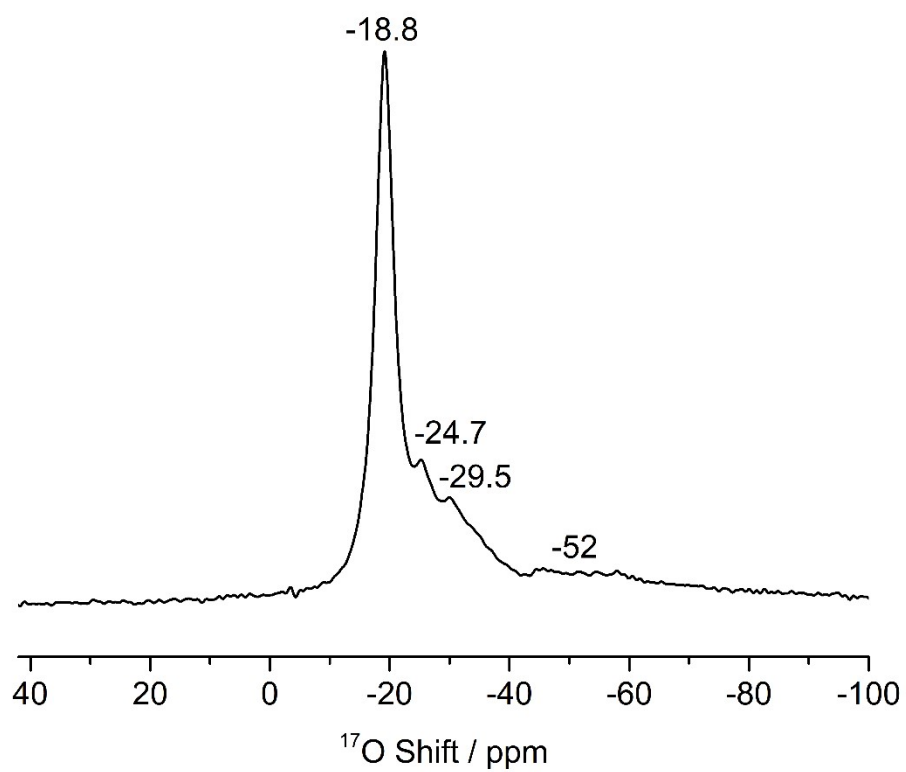

**Figure S5.**  $^{17}\text{O}$  NMR spectra of ZnO nanoplates labeled with  $\text{H}_2^{17}\text{O}$ . A recycle delay of 5 s and  $30^\circ$  pulse of  $1.2\ \mu\text{s}$  were used and 2000 scans were collected for this spectrum.

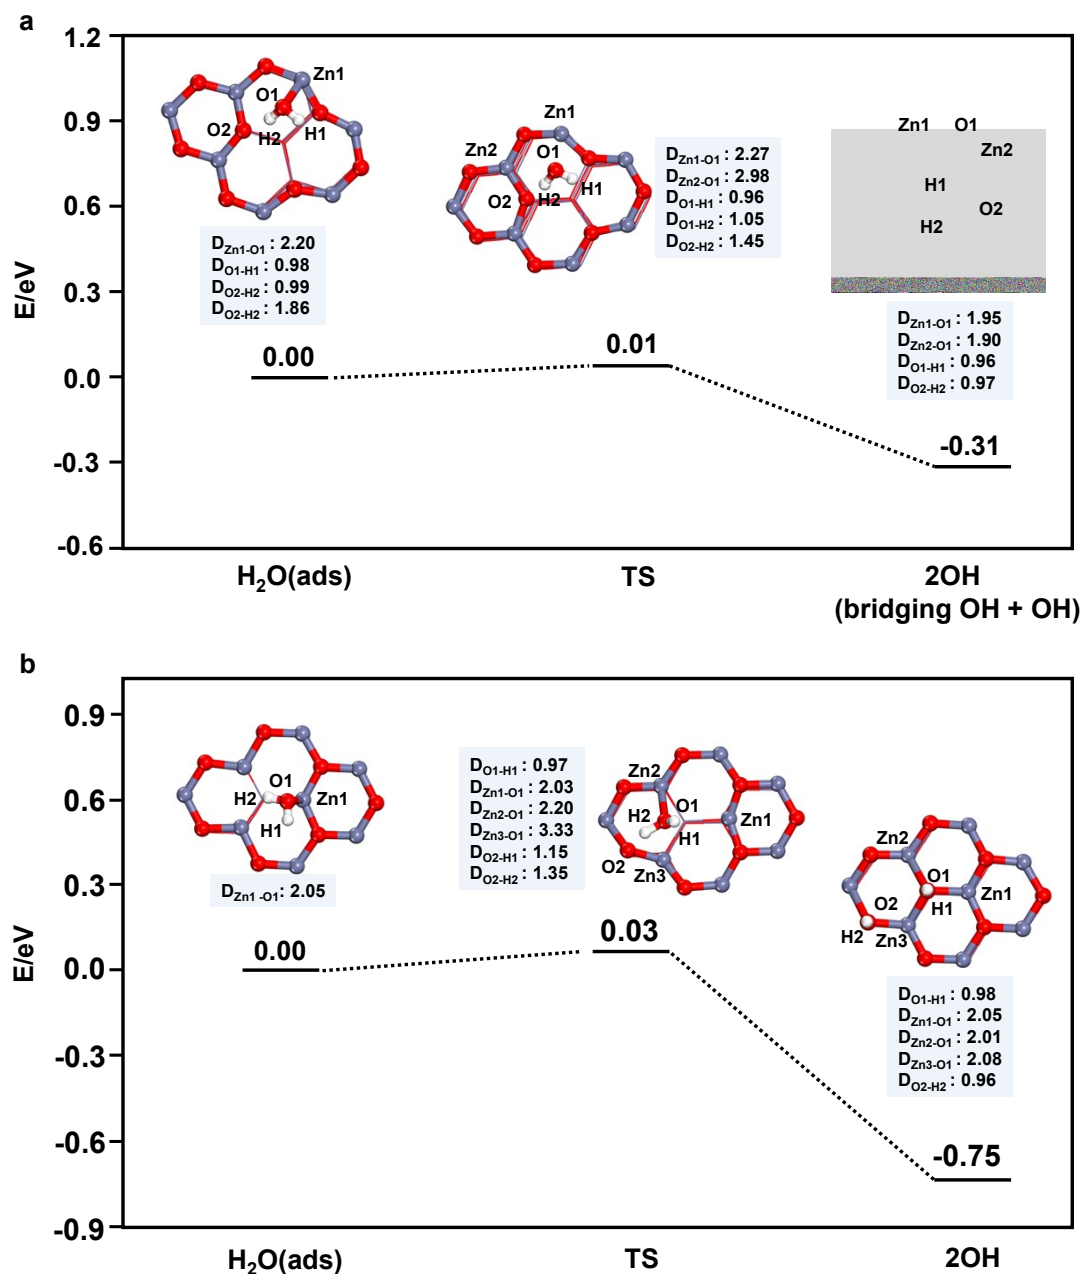

**Figure S6.** Calculated energy profiles for the dissociation of water at (a) Zn vacancy on (0001)-Zn surface of ZnO, and at (b) O vacancy on (0001̄)-O surface. The distances are given in Å. “TS” represents transition states. Gray, red and white spheres represent Zn, O and H atoms, respectively.



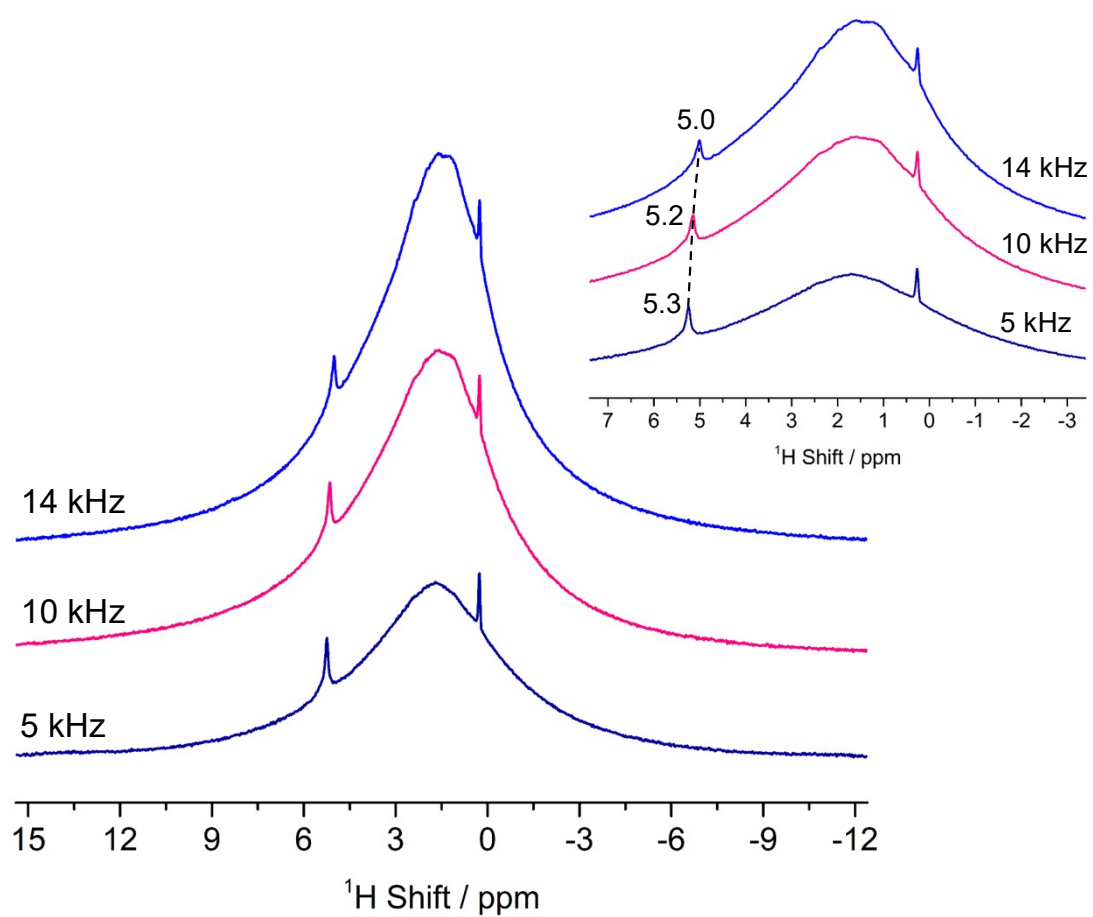

**Figure S7.**  $^1\text{H}$  NMR spectra of ZnO nanoplates obtained under different spinning frequency. Recycle delays of 5 s were used and 64 scans were collected for each NMR spectrum.

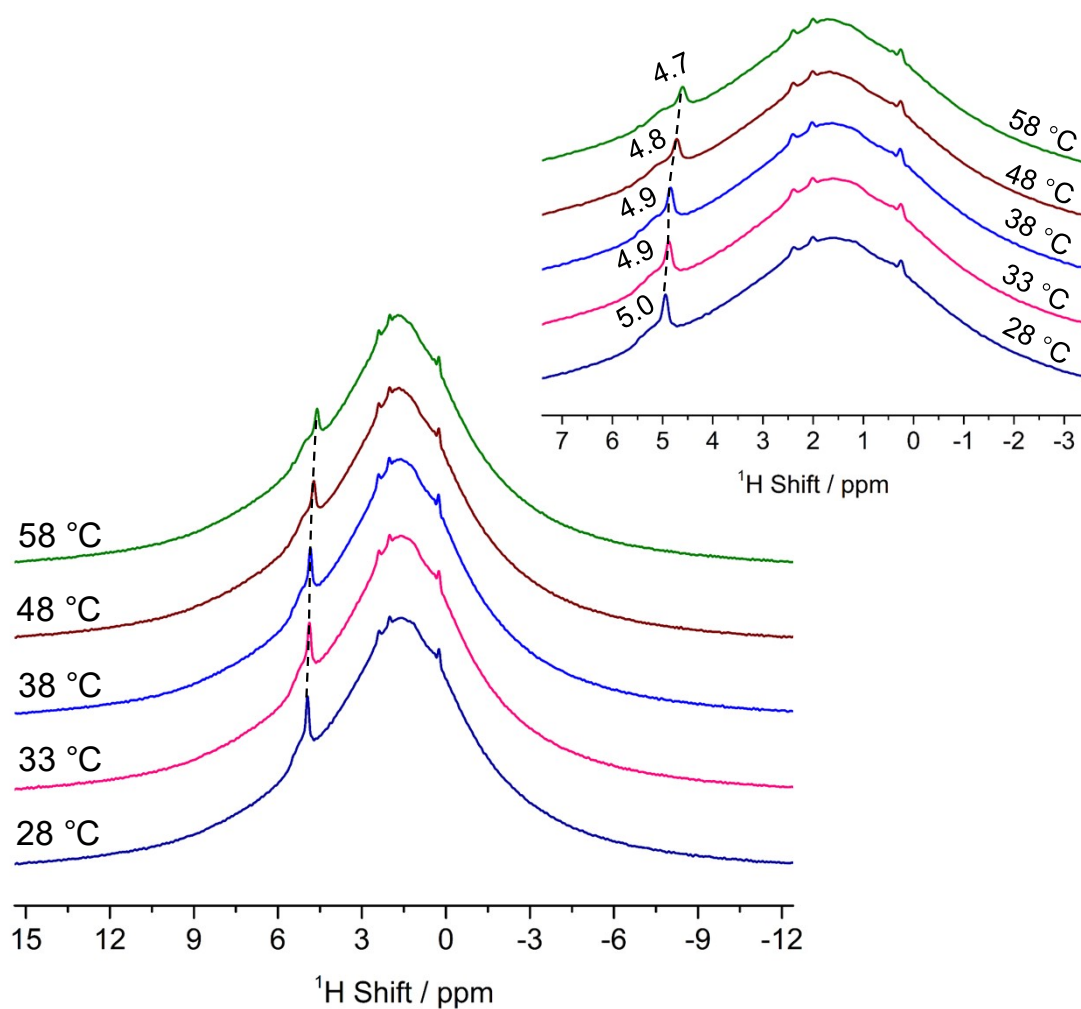

**Figure S8.** Variable temperature  $^1\text{H}$  NMR spectra of ZnO nanoplates. Recycle delays of 5 s were used and 64 scans were collected for each NMR spectrum.

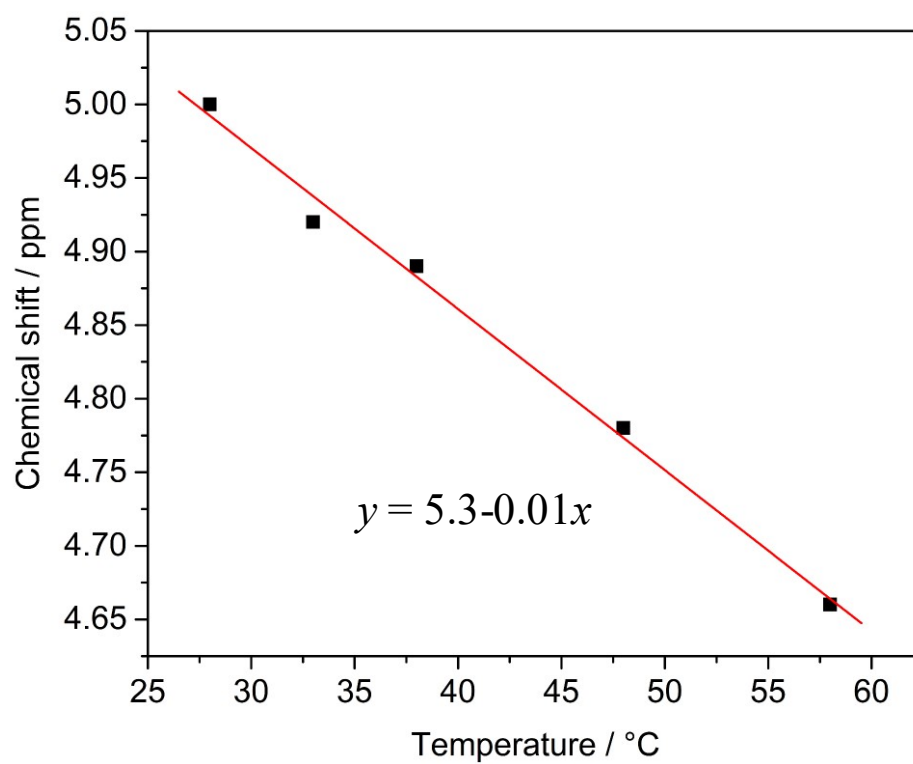

**Figure S9.** The chemical shifts of the high-frequency peak of ZnO nanoplates as a function of probe temperature.

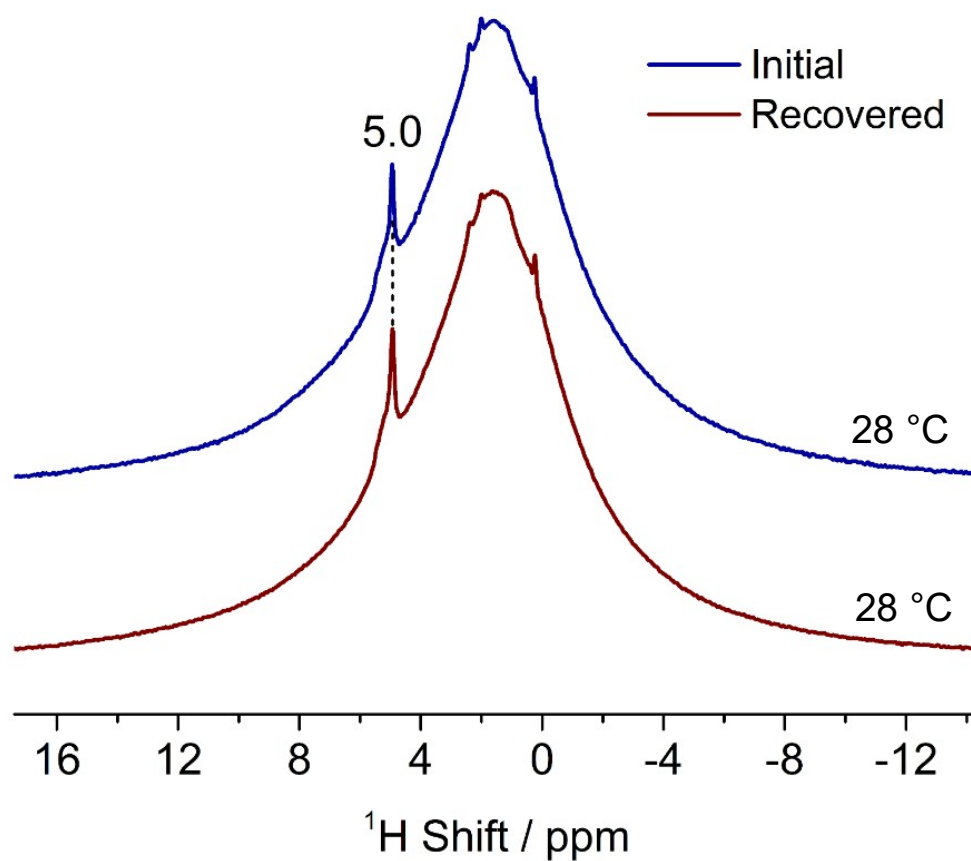

**Figure S10.**  $^1\text{H}$  NMR spectra of ZnO nanoplates.  $^1\text{H}$  NMR spectrum was first measured at 28 °C, and then exposing to different probe temperatures from 28 to 58 °C, as shown in Figure S8. Subsequently, the probe was cooled to its original temperature of 28 °C and the corresponding  $^1\text{H}$  NMR spectrum of ZnO nanoplates was recorded again. Recycle delays of 5 s were used and 64 scans were collected for each NMR spectrum.

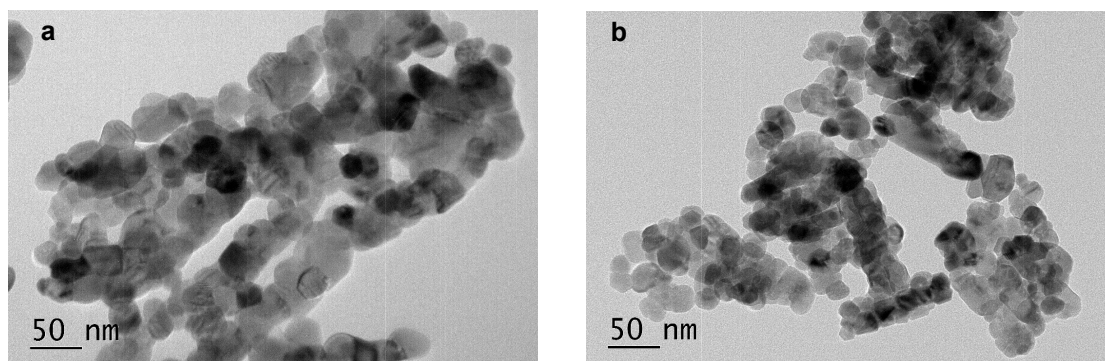

**Figure S11.** TEM images of ZnO nanoplates. (a) Initial samples with calcination. (b) ZnO samples without calcination were first exposed to water vapor for two weeks and then calcined at 300 °C.

## References

- 1 C. P. Grey and A. J. Vega, *J. Am. Chem. Soc.*, 1995, **117**, 8232–8242.
- 2 B. T. Song, Y. H. Li, X.-P. Wu, F. Wang, M. Lin, Y. H. Sun, A.-P. Jia, X. Ning, L. Jin, X. K. Ke, Z. W. Yu, G. Yang, W. H. Hou, W. P. Ding, X.-Q. Gong and L. M. Peng, *J. Am. Chem. Soc.*, 2022, **144**, 23340–23351.
